# Supplementary material for: Facet-engineered NaNbO3 cubes with exposed (101) plane for enhanced lithium-ion storage
Source: Royal Society of Chemistry journal article supplement (doi:10.1039/d4cc05420b), 2024-12-12
Supplement: d4cc05420b1.pdf [file d4cc05420b1.pdf]

***Electronic Supplementary Information***

***for***

**Facet-engineered NaNbO<sub>3</sub> cubes with exposed (101) plane for  
enhanced lithium-ion storage**

Hongping Li,<sup>‡a</sup> Rong Kang,<sup>‡a</sup> Zhilong Song,<sup>a</sup> Dickon H. L. Ng,<sup>b</sup> Xiaoshui Peng,<sup>b</sup> Fen Qiao,<sup>a</sup> Jia

Yan<sup>\*a</sup> and Jiabiao Lian<sup>\*a</sup>

<sup>a</sup> Institute for Energy Research, Jiangsu University, Zhenjiang 212013, P. R. China

<sup>b</sup> School of Science and Engineering, The Chinese University of Hong Kong (Shenzhen),  
Shenzhen 518172, P. R. China

\*Corresponding Author E-mail: [yanj@ujs.edu.cn](mailto:yanj@ujs.edu.cn) (J. Yan); [jblian@ujs.edu.cn](mailto:jblian@ujs.edu.cn) (J. B. Lian).

ORCID: [0000-0002-4439-2988](https://orcid.org/0000-0002-4439-2988)

## **Experimental Section**

### **Material Synthesis**

All chemical reagents were used directly without any further pretreatment. Three kinds of  $\text{NaNbO}_3$  samples exposed to different degrees of the (101) crystal plane were prepared via the typical hydrothermal method. First, 1.5 g of sodium hydroxide ( $\text{NaOH}$ ) and 0.2 g of niobium pentachloride ( $\text{NbCl}_5$ ) were dispersed in 30 mL of deionized water with stirring at room temperature for 1 hour. Subsequently, the suspension was transferred to an autoclave and reacted at 150 °C for 24 hours. After the reaction, the obtained sample was collected, washed with deionized water and ethanol, and dried in an oven at 60 °C. In this experiment, three kinds of  $\text{NaNbO}_3$  (named  $\text{NaNbO}_3$ -1,  $\text{NaNbO}_3$ -3,  $\text{NaNbO}_3$ -6) samples exposed to different degrees of the (101) crystal plane were obtained by controlling different stirring time (1h, 3h, 6h). Therefore, repeated the above experimental steps, but varied the stirring time to get other  $\text{NaNbO}_3$  samples.

### **Material Characterization**

The morphology and microstructure of the samples were observed by the scanning electron microscope (FE-SEM, JEOL, JSM-7800F) and the high-resolution transmission electron microscope (HRTEM, FEI Tecnai G<sup>2</sup> F30 S-Twin TEM operated at 300 kV). The composition and phase information of the samples were investigated by the powder X-ray diffractometer (XRD, German Bruker D8 with  $\text{Cu K}\alpha$ ,  $\lambda=1.54056 \text{ \AA}$ ), with the scanning range from  $10^\circ \sim 80^\circ$  and the scanning rate with  $5^\circ \text{ min}^{-1}$ .

### **Electrochemical Measurement**

The 80 wt. % active material, 10 wt. % super conducting carbon black (SCCB,

Ketjenblack EC-600JD) and 10 wt. % polyvinylidene fluoride (PVDF) binder were mixed in a certain amount of N-Methyl pyrrolidone (NMP) to make the uniform slurry. Then, applied uniformly by a doctor-blade method the slurry onto the prepared coated carbon copper foil. Afterword, the working electrodes were dried in a vacuum oven at 60 °C for 12 hours. Finally, the CR2032 type coin cells were assembled in an argon-filled glove box. The lithium metal was used as the counter electrode. The porous polypropylene membrane (Celgard 2400) was used as the separator. The 1.0 mol L<sup>-1</sup> LiPF<sub>6</sub> in ethylene carbonate (EC), dimethyl carbonate (DMC) and ethyl methyl carbonate (EMC) (1:1:1 v/v/v) was used as the electrolyte. Electrochemical impedance spectroscopy (EIS) and cyclic voltammetry (CV) were recorded on the electrochemical workstation (Gamry Interface 1000E Potentiostat) and the galvanostatic charging and discharging were measured using a Land CT 2001A battery test system.

### **DFT calculations**

All the electronic structure calculations were performed using plane-wave periodic density functional theory as implemented in the Vienna Ab-Initio Simulation Package (VASP).<sup>1-2</sup> The PBE density functional combined with PAW pseudopotentials was used to describe electron-ion interactions. In order to more accurately estimate the non-bonded interaction between Li and the NaNbO<sub>3</sub>, the dispersion corrected term was added into the PBE functional.<sup>3</sup> Two typical slab models were constructed to explore the adsorptive strength and diffuse barriers of Li atom on NaNbO<sub>3</sub> surface (**Fig. S1**), namely, NaNbO<sub>3</sub>(101) and NaNbO<sub>3</sub>(141). As can be seen from it, both slab models consist of four layers and the compositions are both Na<sub>18</sub>Nb<sub>18</sub>O<sub>48</sub>, which is the exactly an integral multiple of the

chemical formula. Hence, it is believed that the models can give reasonable results for the adsorptive strength and diffuse barriers of Li atom. In addition, to avoid the artificial interaction between adjacent surface, a 15 Å vacuum in *c*-axis was constructed. The surface Monkhorst–Pack meshes of 3×3×1 K-point sampling was used to describe the surface Brillouin zone of NaNbO<sub>3</sub>(101), whereas the K-point sampling of NaNbO<sub>3</sub>(141) was set to 1×3×1. For the structural relaxation, the first layer of both models was optimized and other three layers were fixed for both consideration of accuracy and computational cost. Besides, the energy cutoff of 400 eV for the plane-wave expansion of the PAW's and the Gaussian smearing method were adopted. For the diffusion barriers, the climbing image nudged-elastic band (CI-NEB) method with 5 intermediate images was utilized to search the transition states. The adsorptive energy ( $E_{ads}$ ) was calculated as following formula:

$$E_{ads} = E_{com} - E_{slab} - E_{Li} \quad (1)$$

Where the  $E_{com}$  stands for the energy of complex formed by adsorption of Li,  $E_{slab}$  is the energy of the slab model,  $E_{Li}$  is the energy of single Li atom.

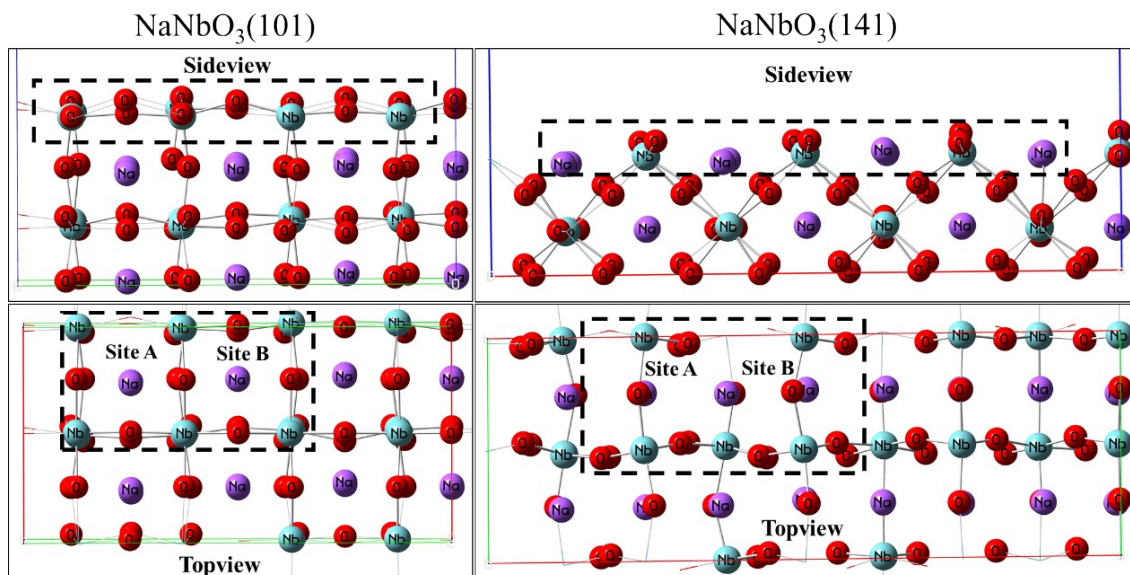

**Fig. S1** Overview of the slab models for NaNbO<sub>3</sub> (101) and NaNbO<sub>3</sub> (141) surfaces. The first/second row illustrate the side view/top view of NaNbO<sub>3</sub> (101) and NaNbO<sub>3</sub> (141) surfaces.

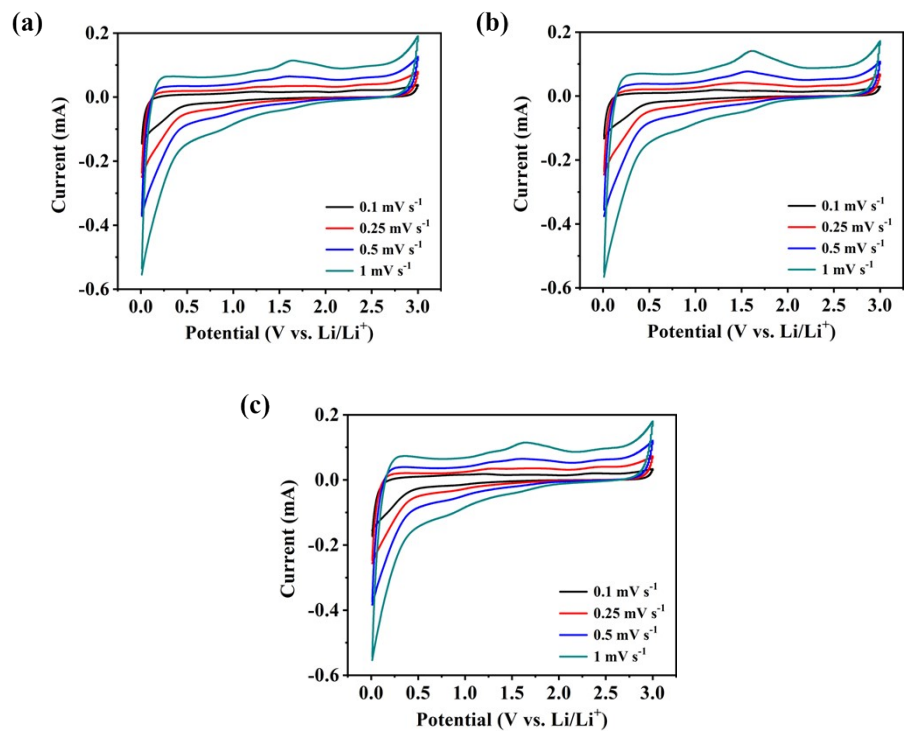

**Fig. S2** CV curves from 0.1 mV s<sup>-1</sup> to 1 mV s<sup>-1</sup> of (a) 1 μm NaNbO<sub>3</sub> cube, (b) 3 μm NaNbO<sub>3</sub> cube, and (c) 6 μm NaNbO<sub>3</sub> cube.

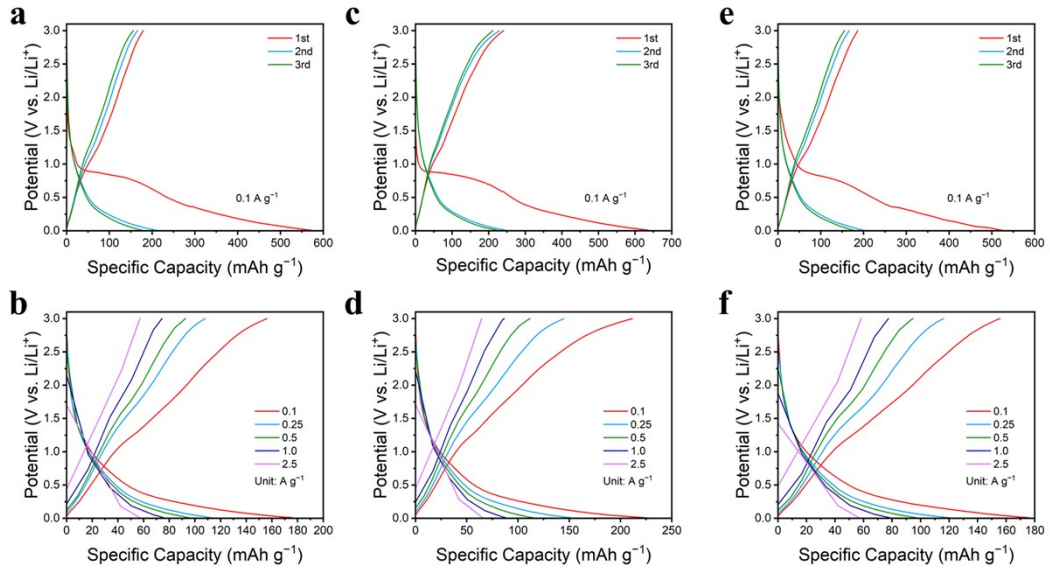

**Fig. S3** Galvanostatic charge/discharge curves of (a, b) 1 μm (c, d) 3 μm, and (e, f) 6 μm NaNbO<sub>3</sub> cube at a low current density and the various current densities.

**Table S1.** The numerical values of  $R_b$ ,  $R_{ct}$ ,  $\sigma_{Li}$  and  $D_{Li}$  of the  $NaNbO_3$  cubes of different sizes.

| Samples<br>(Li-ion) | $R_b$<br>(Ohm) | $R_{ct}$<br>(Ohm) | $\sigma_{Li}$<br>(Ohm s <sup>-1</sup> ) | $D_{Li}$<br>(cm <sup>2</sup> s <sup>-1</sup> ) |
|---------------------|----------------|-------------------|-----------------------------------------|------------------------------------------------|
| 1 $\mu$ m $NaNbO_3$ | 2.76           | 82.23             | 60.06                                   | 1.96*10 <sup>-11</sup>                         |
| 3 $\mu$ m $NaNbO_3$ | 1.02           | 66.92             | 25.99                                   | 1.05*10 <sup>-10</sup>                         |
| 6 $\mu$ m $NaNbO_3$ | 0.99           | 56.96             | 10.13                                   | 6.9*10 <sup>-10</sup>                          |

## Reference

1. G. Kresse and J. Furthmüller, *Comput. Mater. Sci.*, 1996, **6**, 15.
2. G. Kresse and J. Furthmüller, *Phys. Rev. B - Condens. Matter.*, 1996, **54**, 11169.
3. S. Grimme, A. Hansen, J. G. Brandenburg and C. Bannwarth, *Chem. Rev.*, 2016, **116**, 5105.
